# Supplementary material for: High‐Yield Production of Biohybrid Microalgae for On‐Demand Cargo Delivery
Source: PubMed Central journal article supplement (PMC7435244; doi:10.1002/advs.202001256), 2020-07-02
Supplement: ADVS-7-2001256-s001.pdf [file ADVS-7-2001256-s001.pdf]

**Supporting Information**  
for  
**High-Yield Production of Biohybrid Microalgae for  
On-Demand Cargo Delivery**

Mukrime Birgul Akolpoglu<sup>1,\*</sup>, Nihal Olcay Dogan<sup>1,2,\*</sup>, Ugur Bozuyuk<sup>1,\*</sup>, Hakan Ceylan<sup>1,†</sup>, Seda Kizilel<sup>2,†</sup>, Metin Sitti<sup>1,3,4,†</sup>

<sup>1</sup> Physical Intelligence Department, Max Planck Institute for Intelligent Systems, 70569 Stuttgart, Germany

<sup>2</sup> Chemical and Biological Engineering Department, Koç University, 34450 Istanbul, Turkey

<sup>3</sup> School of Medicine and School of Engineering, Koç University, 34450 Istanbul, Turkey

<sup>4</sup> Institute for Biomedical Engineering, ETH Zurich, 8092 Zurich, Switzerland

\* Equally contributing first authors

† Correspondence to: [sitti@is.mpg.de](mailto:sitti@is.mpg.de), [ceylan@is.mpg.de](mailto:ceylan@is.mpg.de), [skizilel@ku.edu.tr](mailto:skizilel@ku.edu.tr)

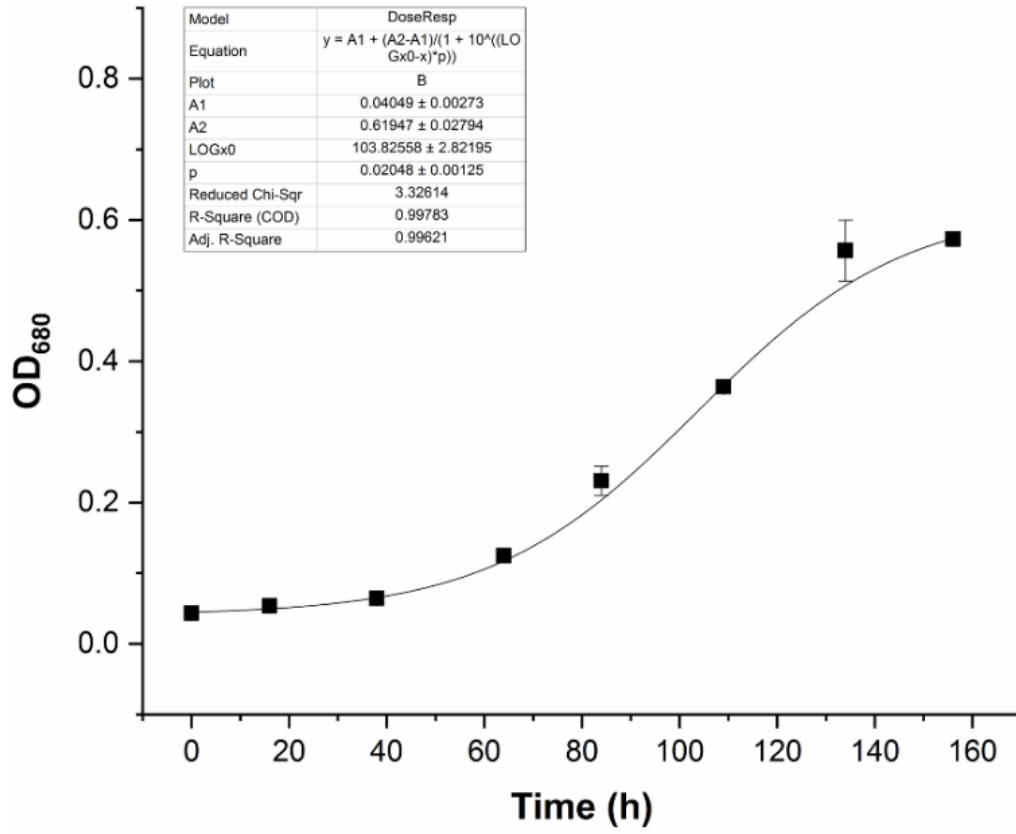

**Figure S1.** Growth curve of *C. reinhardtii*.

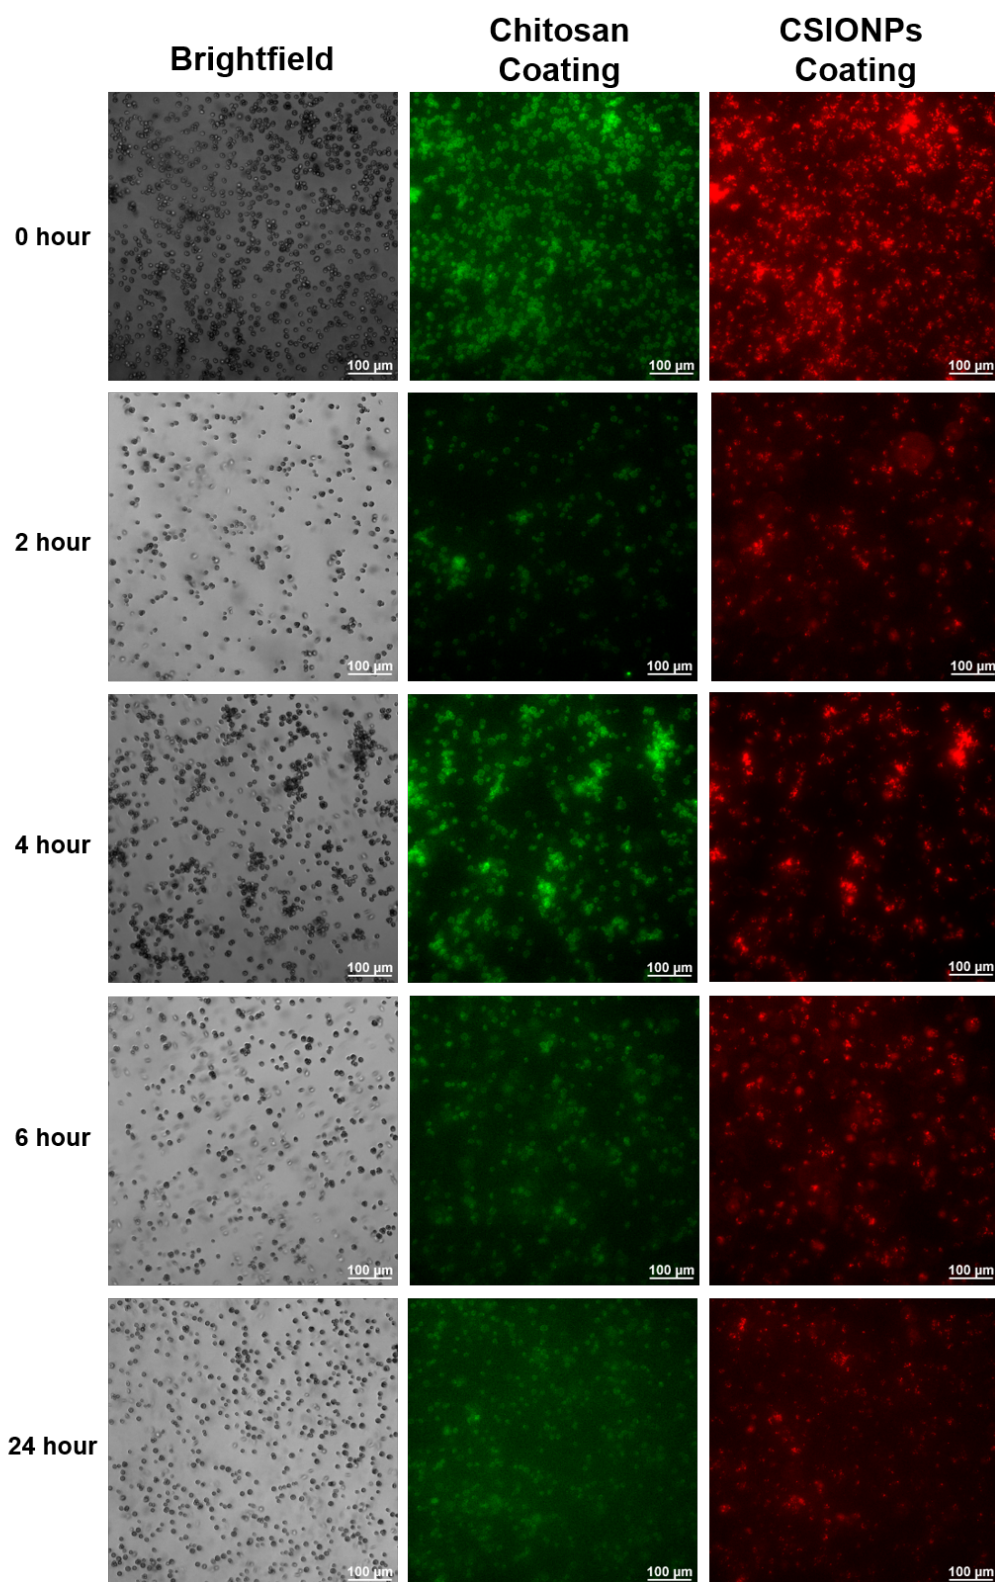

**Figure S2.** Microscopy images showing the time stability of chitosan polymer and CSIONPs coating on microalgae. Images were captured at time points  $t=0$  h, 2 h, 4 h, 6 h, and 24 h. Scale bars = 100  $\mu\text{m}$ .

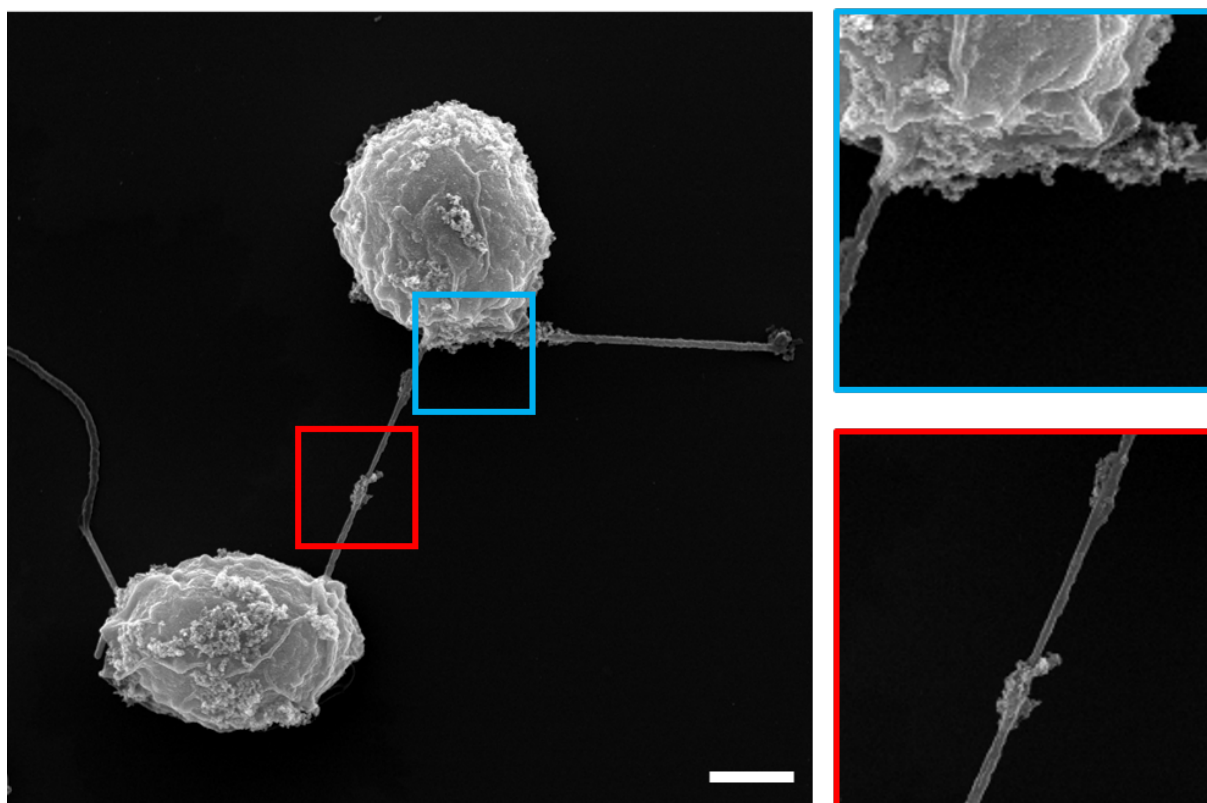

**Figure S3.** SEM image of example biohybrid microalgae. Blue and red framed close-ups represent the attachment of CSIONPs on or close to the flagella. Scale bar = 2  $\mu\text{m}$ .

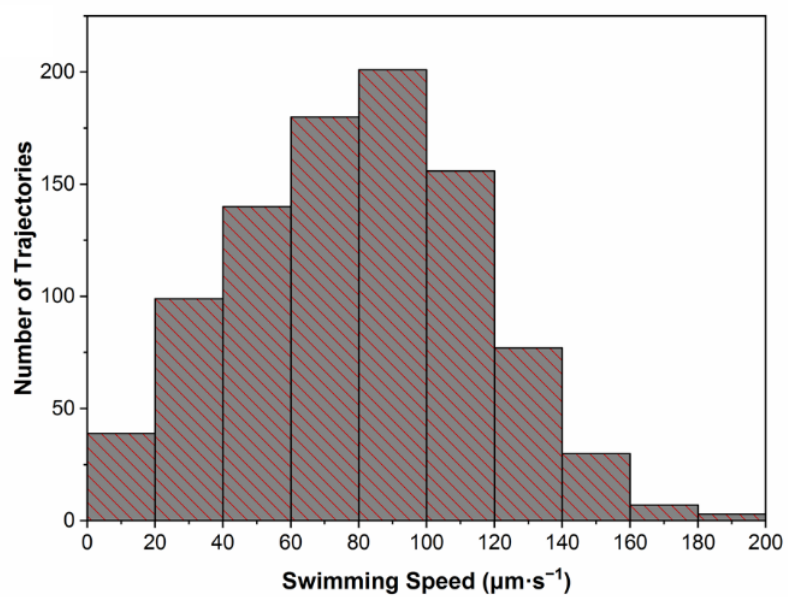

**Figure S4.** Swimming speed measurements of bare microalgae centrifuged twice at 300 x g for 1.5 min. Average swimming speed is 80  $\mu\text{m}/\text{sec}$ .

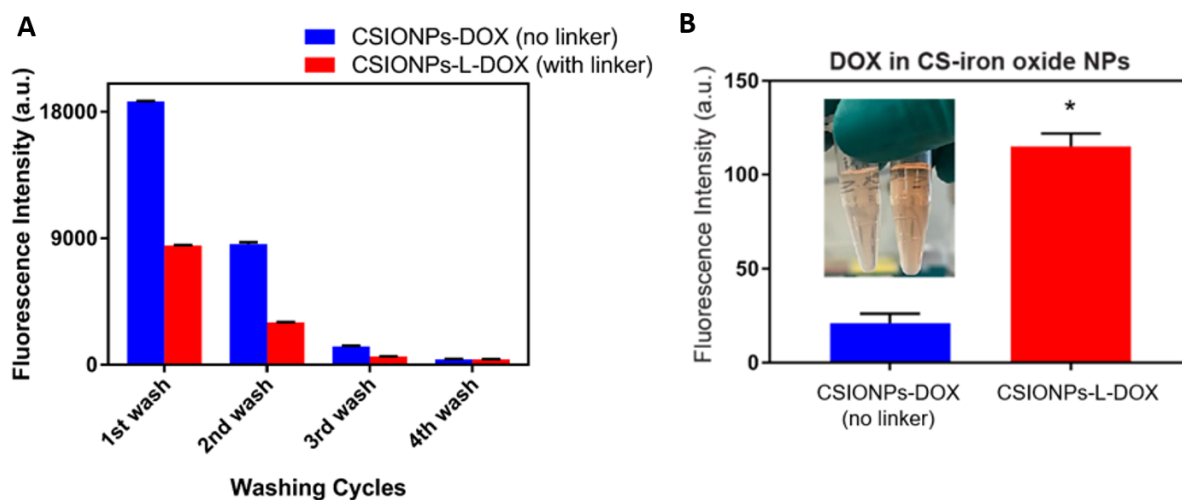

**Figure S5.** Characterization of DOX conjugation on CSIONPs through *o*-nitrobenzyl photocleavable linker. A) Fluorescence of supernatants were measured after each washing step. Fluorescence intensity of CSIONPs-DOX (no linker) showed higher fluorescence, indicating the absence of a chemical conjugation between DOX-azide and CSIONPs. B) Fluorescence intensity of CSIONPs-L-DOX modified nanoparticles.

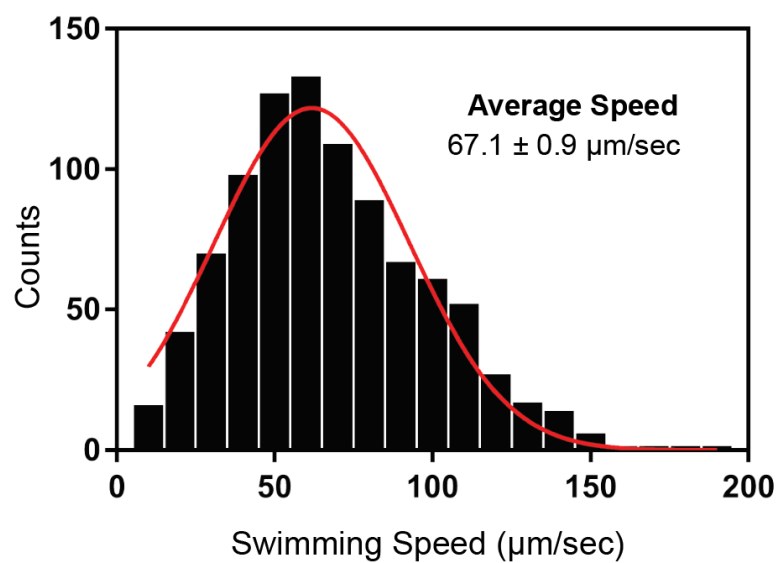

**Figure S6.** Swimming speed experimental data of CSIONPs-L-DOX-modified biohybrid microalgae.

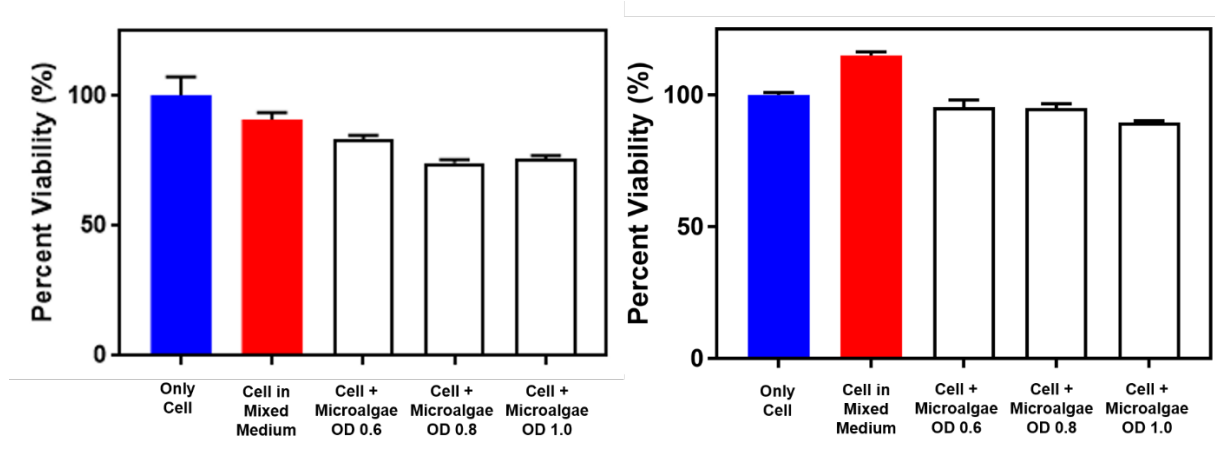

**Figure S7.** Percent viabilities of SKBR-3 cells after incubation for 2 h with bare microalgae at different OD values. A cell counting assay (WST-8) was performed 24 h (left) and 48 h (right).



## **Supplementary Movies**

**Movie S1.** Swimming of bare microalgae in TAP medium.

**Movie S2.** Swimming of biohybrid microalgae in TAP medium.

**Movie S3.** Swimming of biohybrid microalgae showing chitosan coating in TAP medium.

**Movie S4.** Swimming of biohybrid microalgae showing CSIONPs coating in TAP medium.

**Movie S5.** Swimming of bare microalgae centrifuged twice.

**Movie S6.** Direct contact of biohybrid microalgae with SK-BR-3 tumor cells after DOX release.
